## The APC/C and CK1 in the developing brain

Clara Penas, Mary E. Hatten and Nagi G. Ayad

Casein Kinase 1 $\delta$  (CK1 $\delta$ ) is a serine/threonine kinase required for cell cycle progression, circadian rhythm, vesicle trafficking, and neurite outgrowth [1]. CK1 $\delta$  is also a therapeutic target in various cancers, Alzheimer's disease, alcoholism, and sleep disorders [1]. To examine the role of CK1 $\delta$  in brain development, we used cerebellar granule cell progenitors (GCPs) as a model system. GCPs are the most abundant neurons in the mammalian brain and are one of two principal neurons in the cerebellar circuitry [2]. CK1 $\delta$  is expressed in GCPs during peak times of proliferation (postnatal day 6-postnatal day 8). To probe a role for CK1 $\delta$  in proliferation of GCPs during this time, we assayed proliferation in GCPs lacking CK1 $\delta$ , after knockdown of CK1 $\delta$  by RNAi methodology or in purified GCPs treated with highly specific CK1 $\delta$  inhibitor [3]. In all three cases,  $^3\text{H}$ -thymidine incorporation assays showed reduced levels of proliferation. Given CK1 $\delta$ 's role in GCP neurogenesis, we anticipated that CK1 $\delta$  levels would decrease as GCPs exit the cell cycle. Indeed, we found that CK1 $\delta$  protein but not mRNA levels dropped during cell cycle exit, which suggested that CK1 $\delta$  is targeted for degradation during this time.

Importantly, biochemical assays demonstrate that CK1 $\delta$  is targeted for degradation via the Anaphase Promoting Complex/cyclosome (APC/C), a multi-subunit E3 ubiquitin ligase, which has well-established roles in mitotic exit and G1 progression [2]. APC/C is also active in differentiating and differentiated cells [4]. APC/C associates with one of two activators termed Cdc20 or Cdh1, which recruit substrates to bring them into close proximity of the E2 enzyme bound to APC/C [4]. We report that Cdh1 binds to CK1 $\delta$  to initiate APC/C dependent ubiquitination. *In vitro* ubiquitination assays containing purified APC/C and CK1 $\delta$  demonstrate that APC/C mediates CK1 $\delta$  polyubiquitination *in vitro*. APC/C mediate ubiquitination of CK1 $\delta$  was dependent on two N-terminal destruction boxes in CK1 $\delta$  as mutation of these sites abrogated ubiquitination *in vitro* [2]. To demonstrate a requirement for CK1 $\delta$  *in vivo* we deleted CK1 $\delta$  in GCPs in the cerebellum [2]. Deletion of the APC/C activator Cdh1 in GCPs increased CK1 $\delta$  levels, suggesting that CK1 $\delta$  is turned over in GCPs [2]. Collectively, these studies suggest that APC/C targets CK1 $\delta$  for destruction *in vitro* and *in vivo* and that APC/C<sup>Cdh1</sup> is an important regulator of GCP proliferation by controlling CK1 $\delta$ .

Our studies therefore suggest that APC/C-mediated degradation of CK1 $\delta$  functions in multiple steps in CNS

neuronal differentiation. CK1 $\delta$  has been linked to neurite outgrowth [5] and thus it will be important to determine whether APC/C mediated degradation of CK1 $\delta$  occurs in axons or dendrites. Prior studies demonstrated that APC/C inhibition in postmitotic neurons [4] increases neurite outgrowth while CK1 $\delta$  inhibition reduces neurite outgrowth in cell lines [5]. Thus, CK1 $\delta$  could be one of the substrates, which APC/C targets during neurite outgrowth, and whose levels rise during APC/C inhibition or depletion. It will be important to determine whether CK1 $\delta$  protein levels are modulated by APC/C active in postmitotic neurons. Interestingly, there are two forms of the APC/C that are active in postmitotic neurons, APC/C<sup>Cdh1</sup> and APC/C<sup>Cdc20</sup> [4]. APC/C<sup>Cdh1</sup> represses axonal growth [4] while APC/C<sup>Cdc20</sup> activity controls dendritic morphogenesis [4]. APC/C<sup>Cdc20</sup> is localized to centrosomes in postmitotic neurons. Given the finding that CK1 $\delta$  is localized to centrosomes [5] it will be interesting to determine whether APC/C<sup>Cdc20</sup> is able to induce CK1 $\delta$  destruction at centrosomes. An alternative could be that centrosome bound CK1 $\delta$  is protected from APC/C mediated degradation as other APC/C substrates cannot be ubiquitinated and degraded when bound to microtubules [6].

As centrosomal proteins often have roles in migration it will be important to determine whether

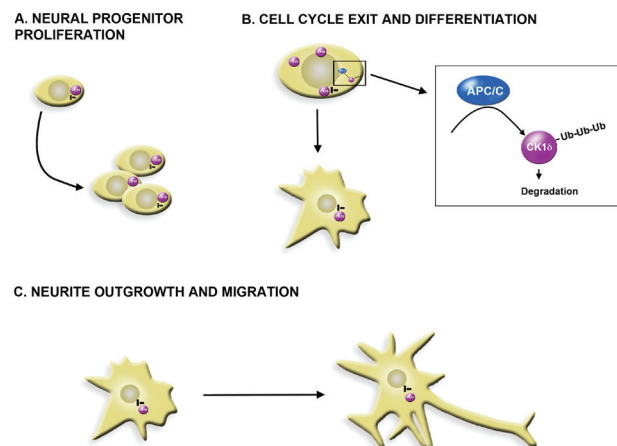

**Figure 1: Model of CK1 $\delta$  and APC/C during proliferation and differentiation of GCPs.** A. CK1 $\delta$  activity is required for GCP proliferation. B. CK1 $\delta$  is degraded via APC/C mediated ubiquitination during GCP cell cycle exit and differentiation. Some centrosome bound CK1 $\delta$  may be protected from APC/C mediated degradation. C. Centrosomal CK1 $\delta$  is required for neurite outgrowth and migration.

APC/C mediated control of CK1 $\delta$  is linked to migration of neuronal precursors. Consistent with a role for CK1 $\delta$  in neuronal migration we found that CK1 $\delta$  inhibition reduced GCP migration *ex vivo* (unpublished observations).

In addition, since CK1 $\delta$  has a role in ciliogenesis<sup>1</sup> and APC/C<sup>Cde20</sup> has been reported to be required for primary cilia formation [7], the APC/C may interact with CK1 $\delta$  in primary cilia. It will be interesting to determine whether APC/C<sup>Cde20</sup> induces CK1 $\delta$  degradation within cilia. Interestingly, since the primary cilium is required for Hedgehog (Hh) pathway signaling as we found that CK1 $\delta$  inhibition or disruption reduced Hh signaling in GCPs [2], it will be essential to determine whether the APC/C-CK1 $\delta$  interaction is important for Hh signaling in GCPs. Future studies will determine the importance of the APC/C-CK1 $\delta$  interaction in various signaling pathways including Hh and WNT, where CK1 $\delta$  has been implicated [1]. Furthermore, it will be critical to determine whether the APC/C-CK1 $\delta$  interaction is dysregulated in various neurological diseases.

Nagi G. Ayad: Center for Therapeutic Innovation, Department of Psychiatry and Behavioral Sciences, University of Miami Miller School of Medicine, Miami, FL, USA

**Correspondence to:** Nagi G. Ayad, **email** [nayad@miami.edu](mailto:nayad@miami.edu)

**Keywords:** the anaphase promoting complex, neurite out-growth, granule cell progenitors, casein kinase, cell cycle exit

**Received:** June 29, 2015

**Published:** July 09, 2015

## REFERENCES

1. Knippschild U, et al. *Frontiers in oncology*. 2014; 4: 96.
2. Penas C, et al. *Cell reports*. 2015; 11: 249-60.
3. Penas C, et al. *The Journal of biological chemistry*. 2014; 289: 18893-903.
4. Penas C, et al. *Frontiers in oncology*. 2011; 1: 60.
5. Greer YE, et al. *The Journal of cell biology*. 2011; 192: 993-1004.
6. Song L, et al. *Molecular cell*. 2014; 53: 179-92.
7. Wang W, et al. *eLife* 3. 2014; e0308.
